# Supplementary material
Source: ML conference proceedings conference paper supplement (https://proceedings.neurips.cc/paper_files/paper/2012/hash/091d584fced301b442654dd8c23b3fc9-Abstract.html)
Supplement: Supplementary file 1 [file 091d584fced301b442654dd8c23b3fc9-Supplemental.zip]

Archive with 3 entries (2 files):
- nips2012-supp.pdf
- __MACOSX/
- __MACOSX/._nips2012-supp.pdf
