# Supplementary material
Source: ML conference proceedings conference paper supplement (https://proceedings.neurips.cc/paper_files/paper/2012/hash/091d584fced301b442654dd8c23b3fc9-Abstract.html)
Supplement: Supplementary file 1 [file 091d584fced301b442654dd8c23b3fc9-Supplemental.zip › nips2012-supp.pdf]

---

# Supplement to Truncation-free Online Variational Inference for Bayesian Nonparametric Models

---

**Chong Wang\***  
Machine Learning Department  
Carnegie Mellon University  
chongw@cs.cmu.edu

**David M. Blei**  
Computer Science Department  
Princeton University  
blei@cs.princeton.edu

## S.1 Explanation using Expectation Propagation (EP)

Our goal is to approximate the posterior distribution

$$p(\beta, z_{1:n} | x_{1:n}, \eta) \propto p(\beta, z_{1:n}, x_{1:n} | \eta)$$

using a fully factorized distribution

$$q(\beta, z_{1:n}) = q(\beta) \prod_{i=1}^n q(z_i).$$

Different from the mean-field approach, Expectation Propagation (EP) tries to minimize the following KL-divergence [4, 5],

$$\text{KL}_{\text{EP}}(p||q) = \int \sum_{z_{1:n}} p(\beta, z_{1:n} | x_{1:n}, \eta) \log \frac{p(\beta, z_{1:n} | x_{1:n}, \eta)}{q(\beta, z_{1:n})} d\beta.$$

First, taking the derivative of  $\text{KL}_{\text{EP}}(p||q)$  w.r.t.  $q(z_i)$  and setting it to zero gives

$$q(z_i) \propto \int \sum_{z_{-i}} p(\beta, z_{1:n} | x_{1:n}, \eta) d\beta = \int p(z_i, x_i | \beta) p(\beta | x_{-i}, \eta) d\beta,$$

where  $z_{-i}$  indicates  $\{z_j, j = 1, \dots, n, \text{ but } j \neq i\}$ . ( $x_{-i}$  is similarly defined.) This is intractable. If we use  $q(\beta)$  as an approximation to the true marginal posterior  $p(\beta | x_{-i}, \eta)$ , and this gives,

$$q(z_i) \propto \int p(z_i, x_i | \beta) p(\beta | x_{-i}, \eta) d\beta \approx \int p(z_i, x_i | \beta) q(\beta) d\beta = \mathbb{E}_{q(\beta)} [p(x_i, z_i | \beta)],$$

which is precisely the definition of  $q(z_i)$  as in Eq. 6 in the main paper.

Next taking the derivative of  $\text{KL}_{\text{EP}}(p||q)$  w.r.t.  $q(\beta)$  and setting it to zero gives

$$q(\beta) = \sum_{z_{1:n}} p(\beta, z_{1:n} | x_{1:n}, \eta) = \sum_{z_{1:n}} p(\beta | z_{1:n}, x_{1:n}, \eta) p(z_{1:n} | x_{1:n}, \eta),$$

This is intractable. We thus use  $q(z_{1:n}) = \prod_{i=1}^n q(z_i)$  as an approximation to the true marginal posterior  $p(z_{1:n} | x_{1:n}, \eta)$ , and this gives,

$$\begin{aligned} q(\beta) &\approx \sum_{z_{1:n}} p(\beta | z_{1:n}, x_{1:n}, \eta) q(z_{1:n}) = \mathbb{E}_{q(z_{1:n})} [p(\beta | z_{1:n}, x_{1:n}, \eta)] \\ &= \exp \{ \log \mathbb{E}_{q(z_{1:n})} [p(\beta | z_{1:n}, x_{1:n}, \eta)] \} \\ &\leq \exp \{ \mathbb{E}_{q(z_{1:n})} [\log p(\beta | z_{1:n}, x_{1:n}, \eta)] \} \\ &\propto \exp \{ \mathbb{E}_{q(z_{1:n})} [\log p(z_{1:n}, x_{1:n}, \beta, \eta)] \}, \end{aligned}$$

---

\*Work was done when the author was with Princeton University.

where the inequality comes from the concavity of the log function. Note that if we assumed  $q(z_i)$  is a peaky distribution; the inequality is almost an equality.<sup>1</sup> We finally have

$$q(\beta) \propto \exp \left\{ \mathbb{E}_{q(z_{1:n})} [\log p(z_{1:n}, x_{1:n}, \beta, \eta)] \right\},$$

which is the update for  $q(\beta)$  as in Eq. 7 in the main paper.

## S.2 Truncation-free online variational inference for the HDP

Hierarchical Dirichlet process (HDP) topic models [6] can be summarized using the stick-breaking construction as follows,

1. Draw top-level topics  $\theta_k$  and sticks  $\pi_k$  for  $k = 1, 2, \dots$ ,
 
$$\theta_k \sim \text{Dirichlet}(\eta),$$

$$\pi_k = \bar{\pi}_k \prod_{l=1}^{k-1} (1 - \bar{\pi}_l), \quad \bar{\pi}_k \sim \text{theta}(1, a)$$
2. For each document  $t$ , draw document-level topic proportions  $\phi_t$ ,<sup>2</sup>

$$\phi_t \sim \text{Dirichlet}(b\pi).$$

For each word  $x_{tn}$  in document  $t$ ,

- (a) Draw the topic index  $z_{tn} \sim \text{Mult}(\phi_t)$ .
- (b) Draw the word  $x_{tn} \sim \text{Mult}(\theta_{z_{tn}})$ .

Unfortunately, topic proportions  $\phi_t$  is not conjugate to sticks  $\pi$ . We adopt an auxiliary variable approach proposed in [6]. The conditional distribution of  $z_t \triangleq z_{t,1:n_t}$ ,

$$p(z_t|\pi) = \int p(z_t|\phi_t)p(\phi_t|\pi)d\phi_t = \frac{\Gamma(b)}{\Gamma(b+n_t)} \prod_k \frac{\Gamma(b\pi_k + n_{tk})}{\Gamma(b\pi_k)}, \quad (1)$$

where  $n_{tk}$  is the number of the words assigned to topic  $k$  in document  $t$  and  $n_t$  is the number of the words in document  $t$ . By introducing a random variable  $s_{tk}$ , the random number of occupied tables in a Chinese restaurant process with  $n_{tk}$  customers and concentration parameter  $b\pi_k$ , we have

$$p(z_t, s_t|\pi) = \frac{\Gamma(b)}{\Gamma(b+n_t)} \prod_k S(n_{tk}, s_{tk})(b\pi_k)^{s_{tk}}, \quad (2)$$

where  $S(n, m)$  are unsigned Stirling numbers of the first kind [1]. Integrating out variable  $s_t$  in Eq. 2 gives the marginal distribution of  $z_t$  given sticks  $\pi$  in Eq. 1. Furthermore, variable  $s_t$  is conjugate to sticks  $\pi$ . Given the formulation in Eq. 2, we can sample  $s_{tk}$  given  $n_{tk}$  using,

$$p(s_{tk}|n_{tk}, b\pi_k) = \frac{\Gamma(b\pi_k)}{\Gamma(b\pi_k + n_{tk})} S(n_{tk}, s_{tk})(b\pi_k)^{s_{tk}}. \quad (3)$$

### S.2.1 Online variational updates

The variational distribution for the global hidden variables  $\theta_k, \bar{\pi}_k$  is  $k = 1, 2, \dots$ .

$$q(\theta, \bar{\pi}) = \prod_k q(\theta_k|\lambda_k)q(\bar{\pi}_k|u_k, v_k),$$

where  $\lambda_k$  is the Dirichlet parameter and  $(u_k, v_k)$  is the theta parameter. Suppose we have obtained one sample<sup>3</sup> of the hidden variables  $s_t$  and  $z_t$  for document  $t$ . Then we have

$$\begin{aligned} \lambda_{kw} &\leftarrow \lambda_{kw} + \rho_t(-\lambda_{kw} + \eta + Dn_{tkw}) \\ u_k &\leftarrow u_k + \rho_t(-u_k + 1 + Ds_{tk}) \\ v_k &\leftarrow v_k + \rho_t(-v_k + a + D \sum_{j=k+1}^{\infty} s_{tj}). \end{aligned}$$

<sup>1</sup>This is usually satisfied in practice—in mixture modeling, most data points belong to one mixture; in topic modeling, words in a document only belong to a very small set of topics [9].

<sup>2</sup>Here the Dirichlet distribution is a generalized version of its finite counterpart [7].

<sup>3</sup>The case with more than one samples can be similarly derived.

where  $n_{tkw}$  is number of times of word  $w$  assigned to topic  $k$  in document  $t$  and  $D$  is the total number of documents. Note that  $s_{tk}$  and  $n_{tkw}$  will be always 0 after  $k$  is larger than the current number of topics. This results in a property that  $q(\theta_k)$  will remain as the prior distribution  $p(\theta_k)$ , if there is no word assignment. We therefore do not need to store those topics until they are instantiated. This also applies to the sticks parameter  $(u_k, v_k)$ .

### S.2.2 Gibbs sampling for the local variables

We use a collapsed Gibbs sampler similar to that in [6] to obtain samples for  $s_t$  and  $z_t$ . The idea is to use the variational distribution  $q(\bar{\pi}|u, v)$  and  $q(\theta|\lambda)$  as ‘‘priors’’. Note that  $\theta$  can be marginalized out while  $\bar{\pi}$  can not. We thus sample  $\bar{\pi}$  jointly with  $s_t$  and  $z_t$ . We denote the vocabulary size as  $W$ .

**Sampling  $z_{tn}$ .** The conditional distribution for  $z_{tn}$  (word  $w$ ) as follows,

$$p(z_{tn} = k | z_{-tn}, \lambda, \pi) \propto (n_{tk, -tn} + b\pi_k) \frac{n_{kw, -tn} + \lambda_{kw}}{n_{k, -tn} + \sum_w \lambda_{kw}}$$

When  $k > T$ , where  $T$  is the current number of topics, this becomes

$$p(z_{tn} = k | z_{-tn}, \lambda, \pi) \propto b\pi_k / W.$$

This implies

$$p(z_{tn} > T | z_{-tn}, \lambda, \pi) \propto b(1 - \sum_{k=1}^T \pi_k) / W.$$

This indicates that we only need to sample  $z_{tn}$  up to  $T + 1$ . When a new topic is generated, we set  $k = T + 1$ , and sample  $\bar{\pi}_{T+1} \sim \text{Beta}(1, a)$  and set  $\pi_{T+1} = \bar{\pi}_{T+1} \prod_{k=1}^T (1 - \bar{\pi}_k)$ .

**Sampling  $s_{tk}$ .** Sampling  $s_{tk}$  can be done using Eq. 3.

**Sampling  $\pi$ .** We sample  $\pi$  given the following conditional distribution,

$$p(\bar{\pi}_k) \propto \bar{\pi}_k^{u_k - 1 + \sum_{t \in \mathbb{S}} s_{tk}} (1 - \bar{\pi}_k)^{v_k - a + \sum_{t \in \mathbb{S}} \sum_{j=k+1}^{\infty} s_{tj}}.$$

We do not need to sample sticks  $\bar{\pi}_k$  when  $k > T$ ; they just come from the prior distribution.

## S.3 Computing the held-out likelihood

The likelihood we want to compute is defined as

$$\text{likelihood}_{\text{pw}} \triangleq \log p(\mathcal{D}_{\text{test}} | \mathcal{D}_{\text{train}}) / \sum_{x_i \in \mathcal{D}_{\text{test}}} |x_i|.$$

Since this is intractable for both DP and HDP, we use following approximations. For both DP and HDP, we use the mean of the global variational distribution  $q(\theta, \bar{\pi})$  to represent the inferred model. We ignore the unused components in our algorithm. This results in  $\hat{\theta} = \mathbb{E}_{q(\theta)} [\theta]$  and  $\hat{\pi} = \mathbb{E}_{q(\bar{\pi})} [\pi]$ , both with finite dimensions. In other words, DP mixtures reduce to a finite mixture model and HDP mixtures reduce to LDA [2]. Then  $\log p(\mathcal{D}_{\text{test}} | \mathcal{D}_{\text{train}})$  is approximated by

$$\log p(\mathcal{D}_{\text{test}} | \mathcal{D}_{\text{train}}) \approx \sum_{x_i \in \mathcal{D}_{\text{test}}} \log p(x_i | \hat{\theta}, \hat{\pi}).$$

For DP mixtures, the term  $p(x_i | \hat{\theta}, \hat{\pi})$  is analytically tractable,

$$p(x_i | \hat{\theta}, \hat{\pi})_{\text{DP}} = \sum_k \hat{\pi}_k \prod_w \hat{\theta}_{kw}^{\sum_j 1[x_{ij}=w]}.$$

However, for HDP mixtures, the term  $\log p(x_i | \hat{\theta}, \hat{\pi})$  is still intractable. We propose to use importance sampling. [8] shows that importance sampling can underestimate the probability, but usually gives the correct ranking of different models. To be concrete,

$$p(x_i | \hat{\theta}, \hat{\pi})_{\text{HDP}} = \int p(\phi_i | \hat{\pi}) \prod_j \sum_{z_{ij}} p(z_{ij} | \phi_i) p(x_{ij} | \hat{\theta}, z_{ij}) d\phi_i.$$

To approximate this integral, we first use a collapsed Gibbs sampler to sample topic assignments  $z_{ij}$ , then construct a proposal distribution over  $\phi_i$  using these samples [3],

$$q(\phi_i) = \text{Dirichlet}(\phi_i | \dots, b\hat{\pi}_k + \sum_j 1[z_{ij} = k], \dots).$$

Samples from  $q(\phi_i)$  are used for importance sampling to approximate  $p(x_i | \hat{\theta}, \hat{\pi})_{\text{HDP}}$ .

## References

- [1] C. Antoniak. Mixtures of Dirichlet processes with applications to Bayesian nonparametric problems. *The Annals of Statistics*, 2(6):1152–1174, 1974.
- [2] D. Blei, A. Ng, and M. Jordan. Latent Dirichlet allocation. *Journal of Machine Learning Research*, 3:993–1022, January 2003.
- [3] T. Griffiths and M. Steyvers. Finding scientific topics. *Proceedings of the National Academy of Sciences (PNAS)*, 2004.
- [4] T. Minka. Expectation propagation for approximate Bayesian inference. In *Uncertainty in Artificial Intelligence (UAI)*, pages 362–369, 2001.
- [5] T. Minka. Divergence measures and message passing. Technical Report TR-2005-173, Microsoft Research, 2005.
- [6] Y. Teh, M. Jordan, M. Beal, and D. Blei. Hierarchical Dirichlet processes. *Journal of the American Statistical Association*, 101(476):1566–1581, 2007.
- [7] Y. Teh, K. Kurihara, and M. Welling. Collapsed variational inference for HDP. In *Advances in Neural Information Processing Systems (NIPS)*, 2007.
- [8] H. Wallach, I. Murray, R. Salakhutdinov, and D. Mimno. Evaluation methods for topic models. In *International Conference on Machine Learning (ICML)*, 2009.
- [9] L. Yao, D. Mimno, and A. McCallum. Efficient methods for topic model inference on streaming document collections. In *International Conference on Knowledge Discovery and Data Mining (KDD)*, 2009.
